# Supplementary material for: Anti-Hypochlorite, Antioxidant, and Catalytic Activity of Three Polyphenol-Rich Super-Foods Investigated with the Use of Coumarin-Based Sensors
Source: PubMed Central journal article supplement (PMC7277801; doi:10.3390/biom10050723), 2020-05-06
Supplement: biomolecules-10-00723-s001.pdf [file biomolecules-10-00723-s001.pdf]

# Supplementary materials for:

## Anti-hypochlorite, antioxidant, and catalytic activity of three polyphenol-rich *super-foods* investigated with use of coumarin-based sensor

Karolina Starzak <sup>1\*</sup>, Tomasz Świergosz<sup>1</sup>, Arkadiusz Matwijczuk<sup>2</sup>, Bernadette Creaven<sup>3</sup>, Janusz Podleśny<sup>4</sup> and Dariusz Karcz<sup>1\*</sup>

<sup>1</sup> Department of Analytical Chemistry (C1), Faculty of Chemical Engineering and Technology, Cracow University of Technology, Warszawska 24, 31-155 Cracow, Poland; karolina.starzak@pk.edu.pl, tomasz.swiergosz@pk.edu.pl, dariusz.karcz@pk.edu.pl

<sup>2</sup> Department of Biophysics, University of Life Sciences in Lublin, Akademicka 13, 20-950 Lublin, Poland; arkadiusz.matwijczuk@up.lublin.pl

<sup>3</sup> School of Chemical and Pharmaceutical Sciences, Technological University Dublin, Kevin St., Dublin 2, Ireland; Bernie.Creaven@tudublin.ie

<sup>4</sup> Institute of Soil Science and Plant Cultivation - State Research Institute, Puławy, Poland; jp@iung.pulawy.pl

\* Correspondence: karolina.starzak@pk.edu.pl (K.S); dariusz.karcz@pk.edu.pl (D.K);

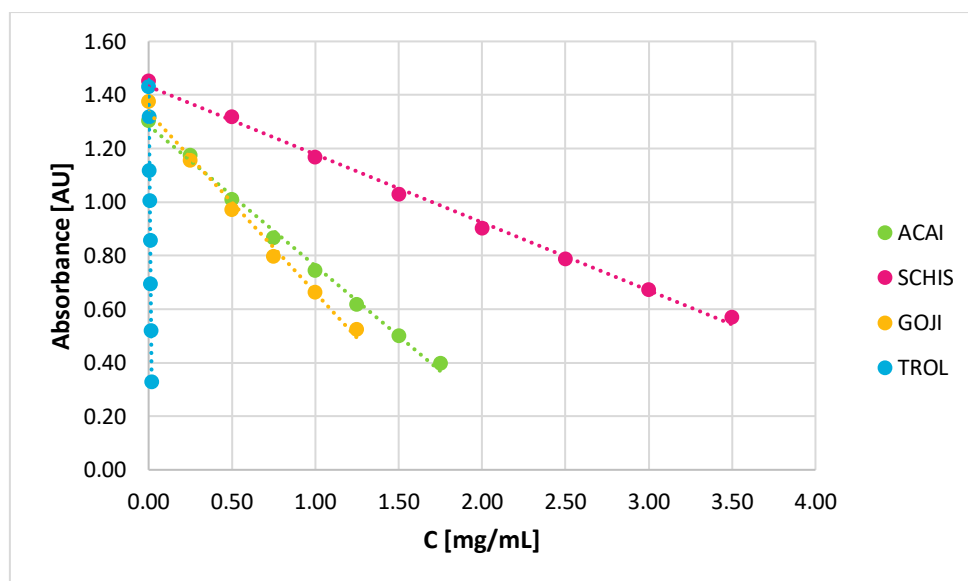

**Figure S1.** Decrease of ABTS•<sup>+</sup> absorbance measured at  $\lambda_{\max}$  734 nm in the presence of increasing concentration of selected reagents after 30 min of reaction at pH 3 at 25 °C.

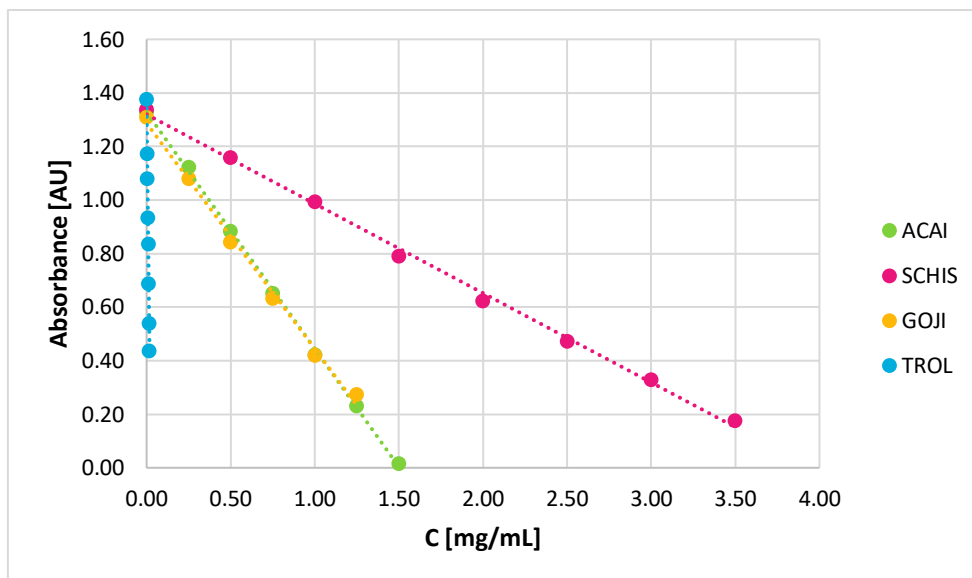

**Figure S2.** Decrease of ABTS•<sup>+</sup> absorbance measured at  $\lambda_{\max}$  734 nm in the presence of increasing concentration of selected reagents after 30 min of reaction at pH 5 at 25 °C.

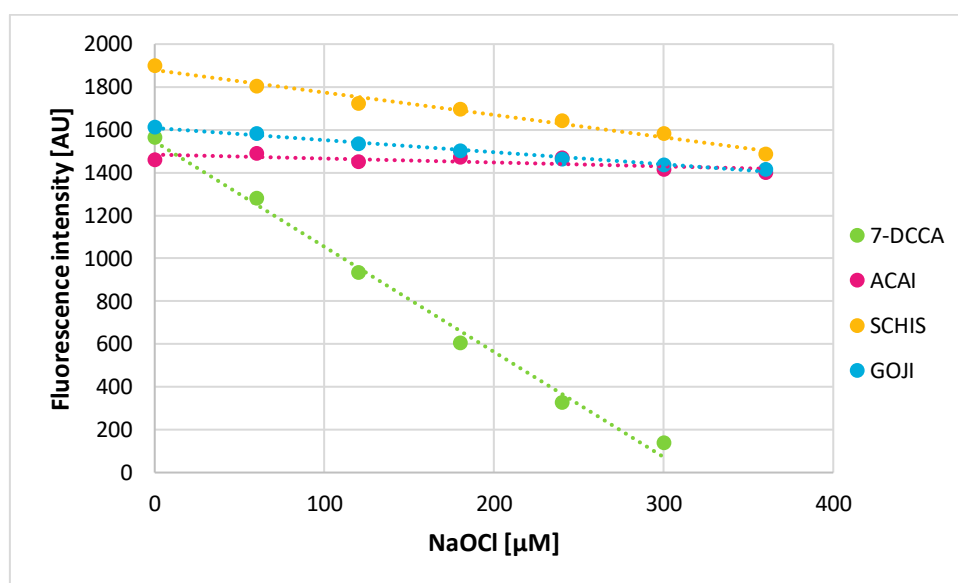

**Figure S3.** Decrease of fluorescence intensity of 150  $\mu$ M of 7-DCCA probe ( $\lambda_{\text{Ex}}$  289 nm,  $\lambda_{\text{Em}}$  460 nm) under the presence of aqueous berries extracts (4 mg/mL) incubated with increasing concentration of NaOCl for 15 min at pH 3.

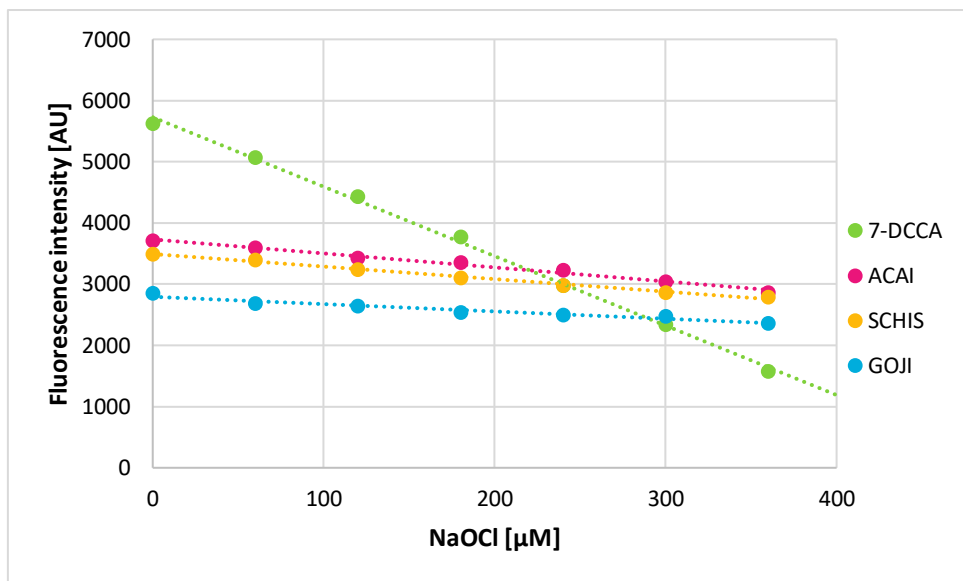

**Figure S4.** Decrease of fluorescence intensity of 150  $\mu\text{M}$  of 7-DCCA probe ( $\lambda_{\text{Ex}}$  289 nm,  $\lambda_{\text{Em}}$  460 nm) under the presence of aqueous berries extracts (4 mg/mL) incubated with increasing concentration of NaOCl for 15 min at pH 5.

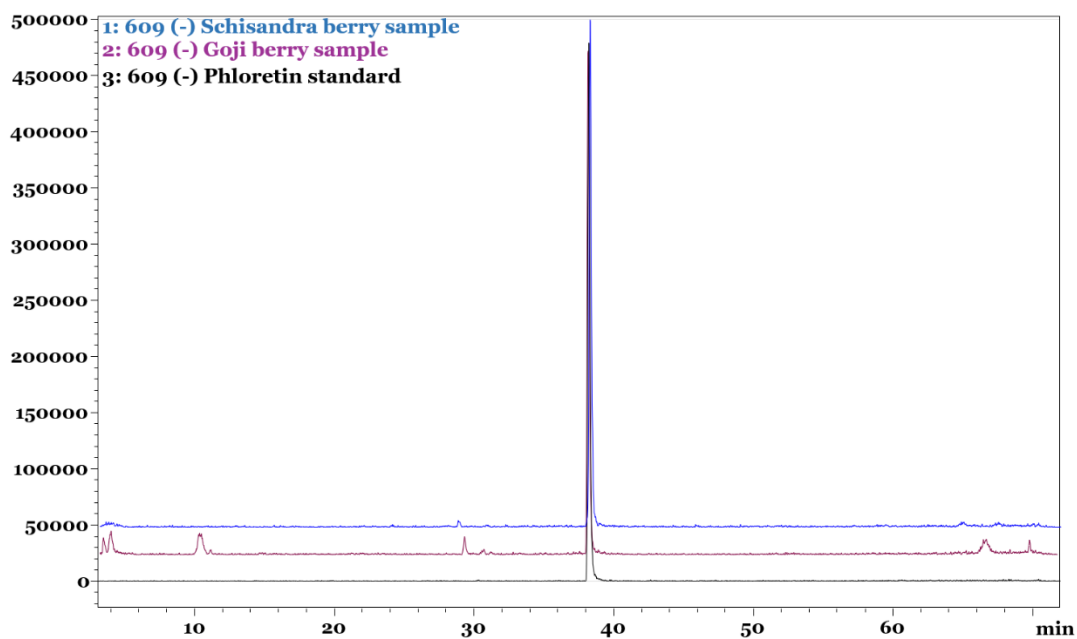

**Figure S5.** LC-MS (SIM) chromatogram recorded in negative mode, of an aqueous extracts of goji and schisandra berries compared with standard solution of phloretin.

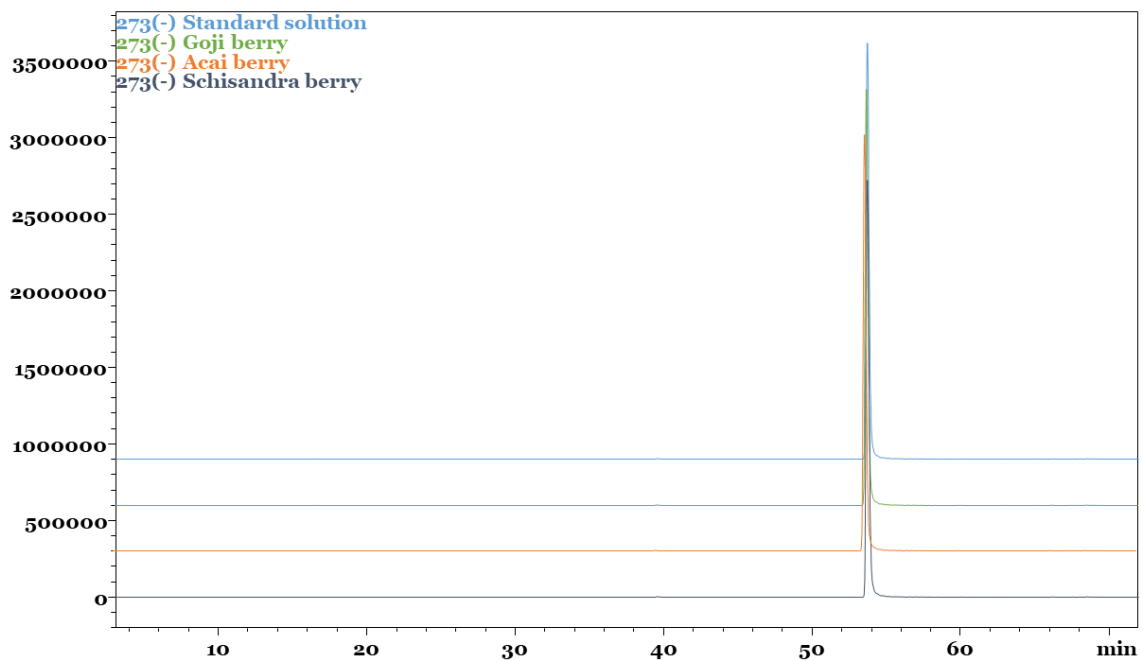

Figure S6. LC-MS (SIM) chromatogram recorded in negative mode, of an aqueous extracts of acai, goji and schisandra berries compared with standard solution of chlorogenic acid.

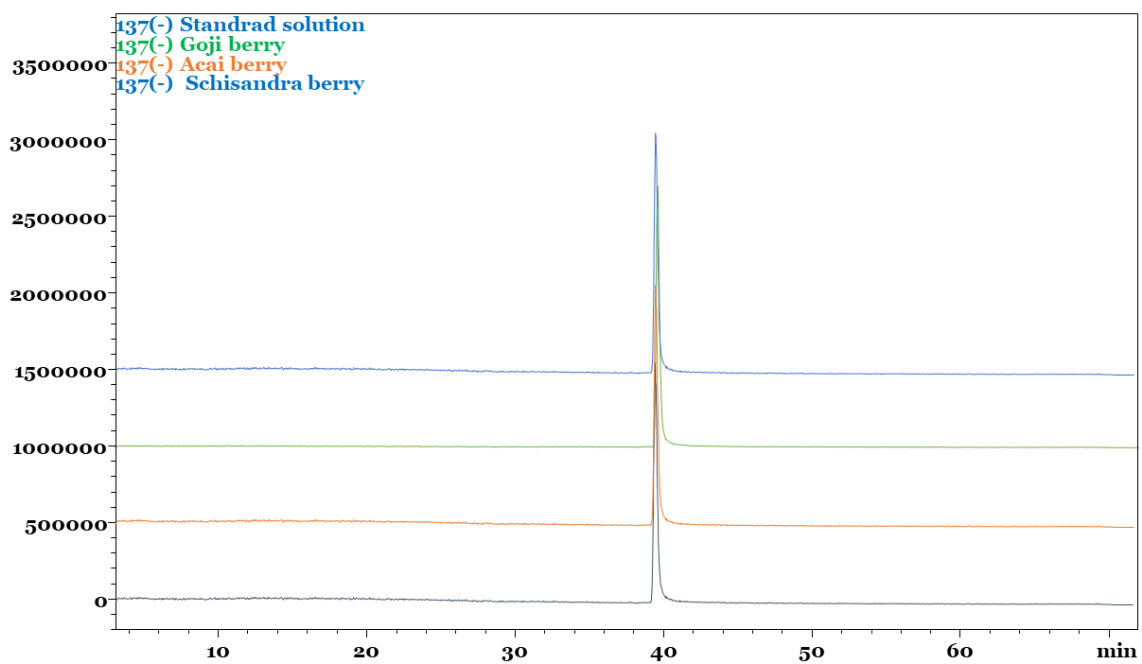

Figure S7. LC-MS (SIM) chromatogram recorded in negative mode, of an aqueous extracts of acai, goji and schisandra berries compared with standard solution of salicylic acid.

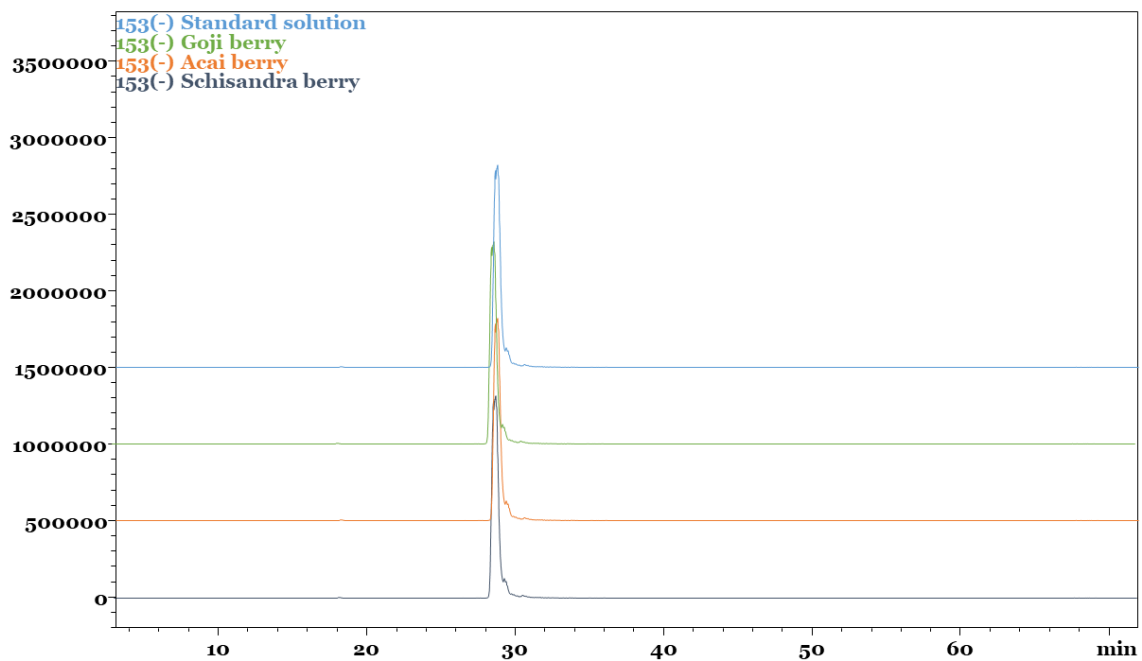

**Figure S8.** LC-MS (SIM) chromatogram recorded in negative mode, of an aqueous extracts of acai, goji and schisandra berries compared with standard solution of 2,4-diOH-benzoic acid.

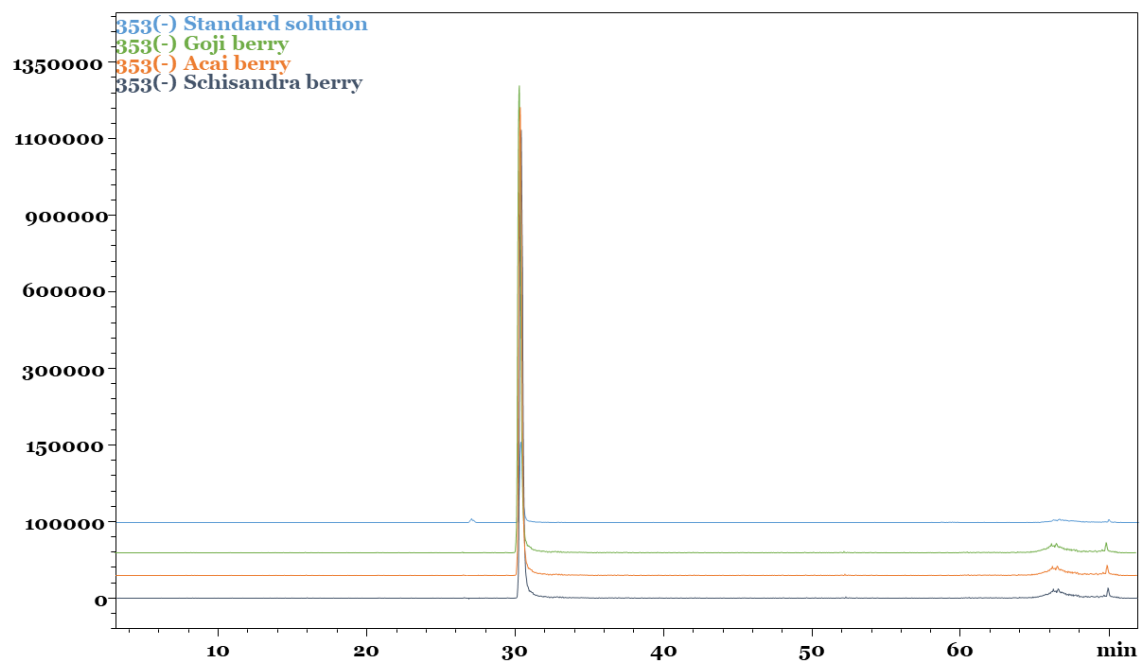

**Figure S9.** LC-MS (SIM) chromatogram recorded in negative mode, of an aqueous extracts of acai, goji and schisandra berries compared with standard solution of rutin.
